# Supplementary material for: Highly efficient electrochemiluminescence from iridium(iii) complexes with 2-phenylquinoline ligand
Source: Royal Society of Chemistry journal article supplement (doi:10.1039/c4dt02809k), 2014-11-19
Supplement: c4dt02809k1.pdf [file c4dt02809k1.pdf]

# Electronic Supplementary Information

## Highly Efficient Electrochemiluminescence from Iridium(III) Complexes with 2-Phenylquinoline Ligand

Yuyang Zhou<sup>\*,a</sup>, Wanfei Li<sup>b</sup>, Linpo Yu<sup>b</sup>, Yang Liu<sup>b,c</sup>, Xiaomei Wang<sup>a</sup>, Ming Zhou<sup>\*,b,c</sup>

<sup>a</sup>Jiangsu Key Laboratory of Environmental Functional Materials, School of Chemistry  
Biology and Material Engineering, Suzhou University of Science and Technology,  
Suzhou, Jiangsu, 215009, P. R. China. E-mail:zhouyuyang@mail.usts.edu.cn.

<sup>b</sup>Division of Nanobiomedicine, Suzhou Institute of Nano-Tech and Nano-Bionics,  
Chinese Academy of Sciences, 398 Ruoshui Road, Suzhou Industrial Park, Suzhou,  
Jiangsu, 215123, P. R. China. E-mail: mzhou2007@sinano.ac.cn.

<sup>c</sup>SunaTech Inc., bioBAY, Suzhou Industrial Park, Suzhou, Jiangsu, 215123, P. R.  
China.

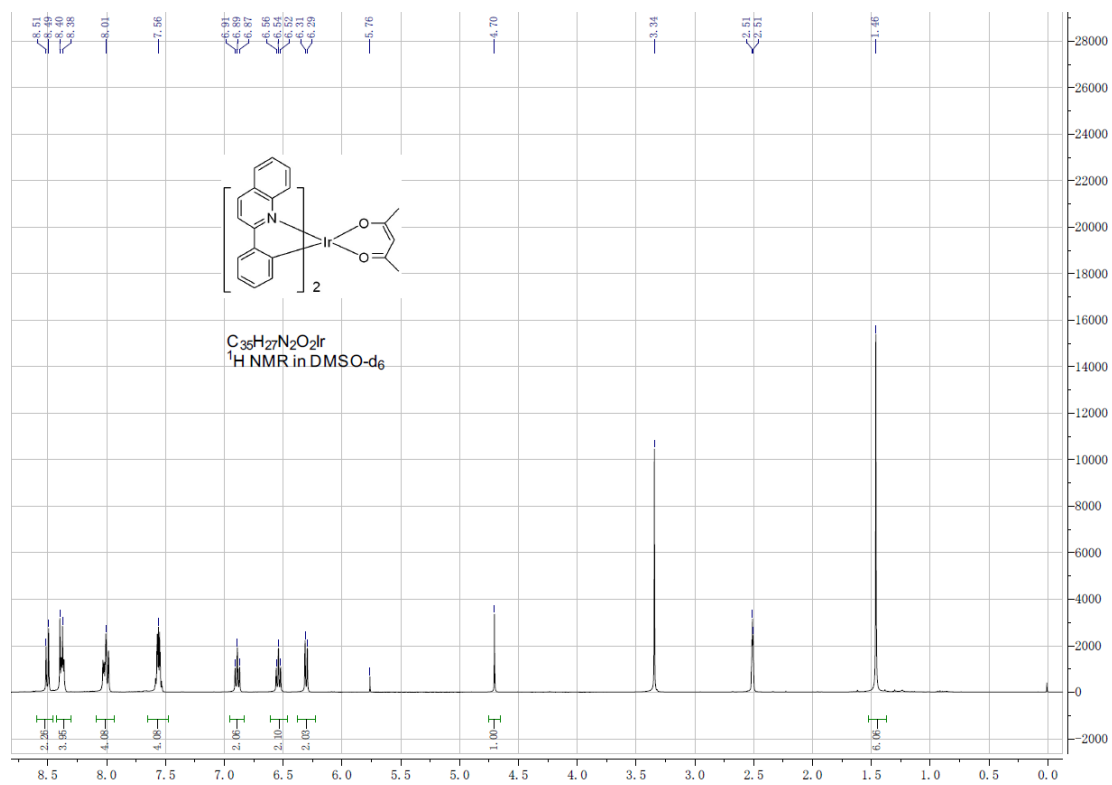

Figure S1.  $^1H$  NMR spectrum of complex **1** in  $DMSO-d_6$ .

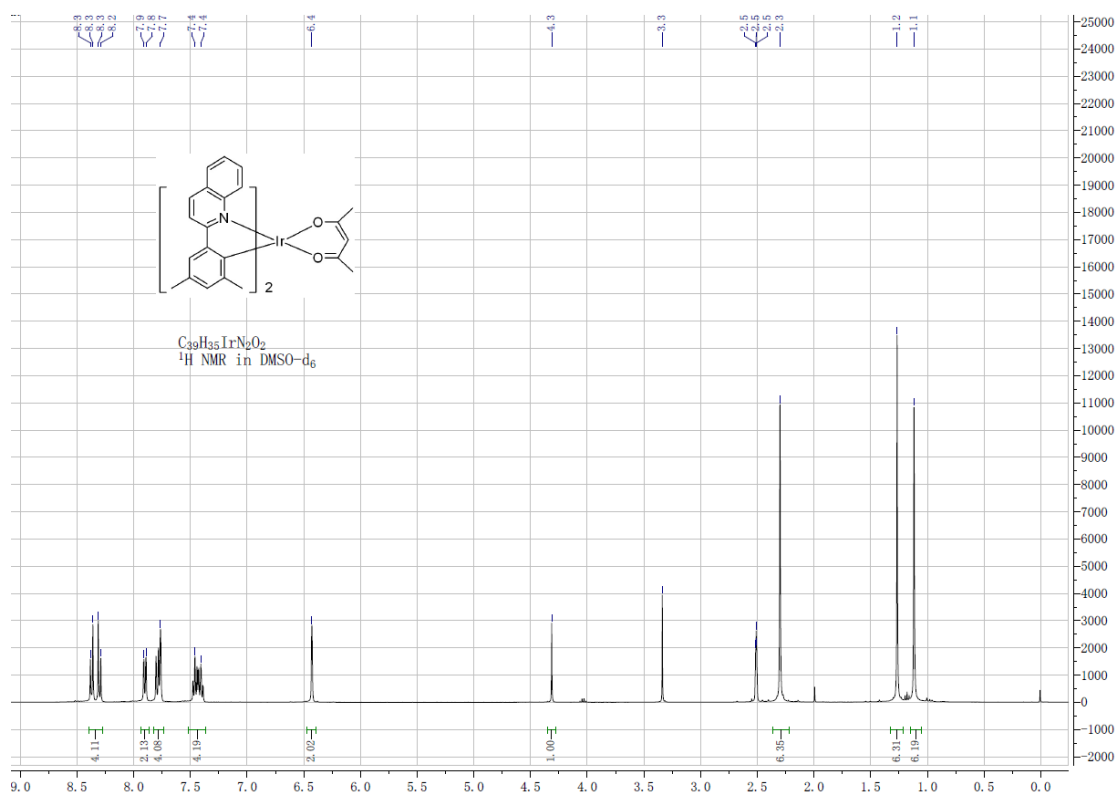

Figure S2. <sup>1</sup>H NMR spectrum of complex **2** in DMSO-d<sub>6</sub>.

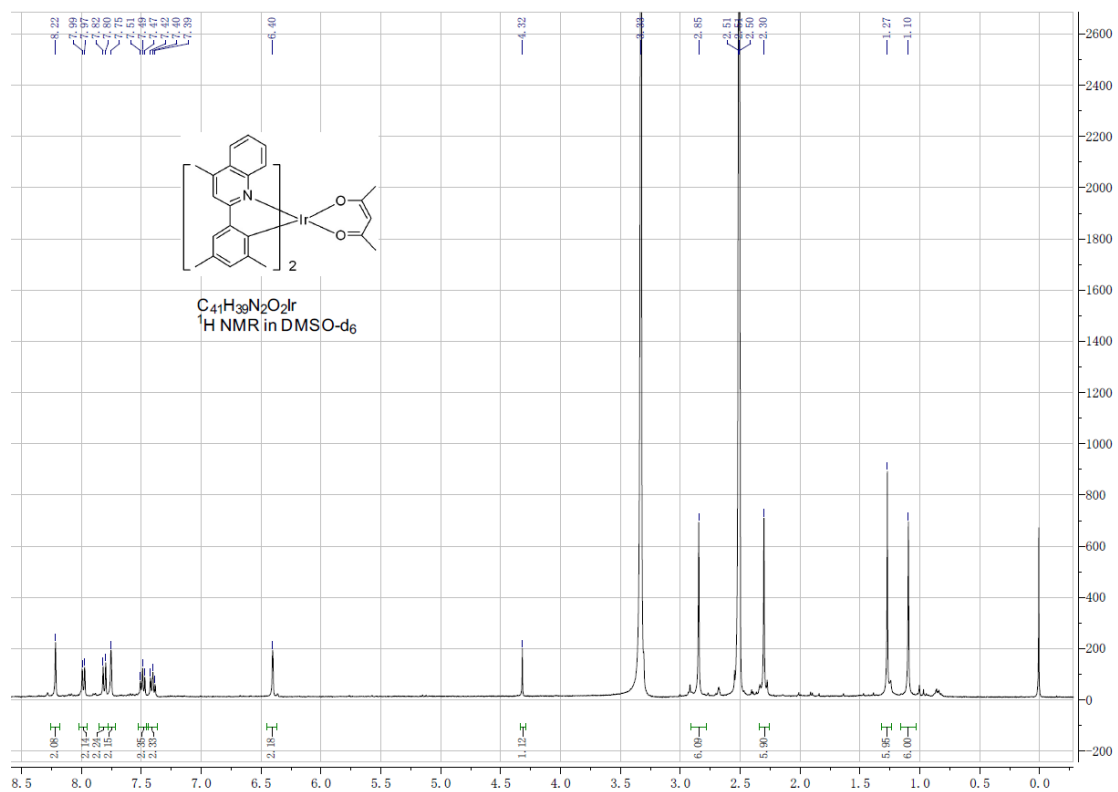

Figure S3.  $^1H$  NMR spectrum of complex **3** in  $DMSO-d_6$ .

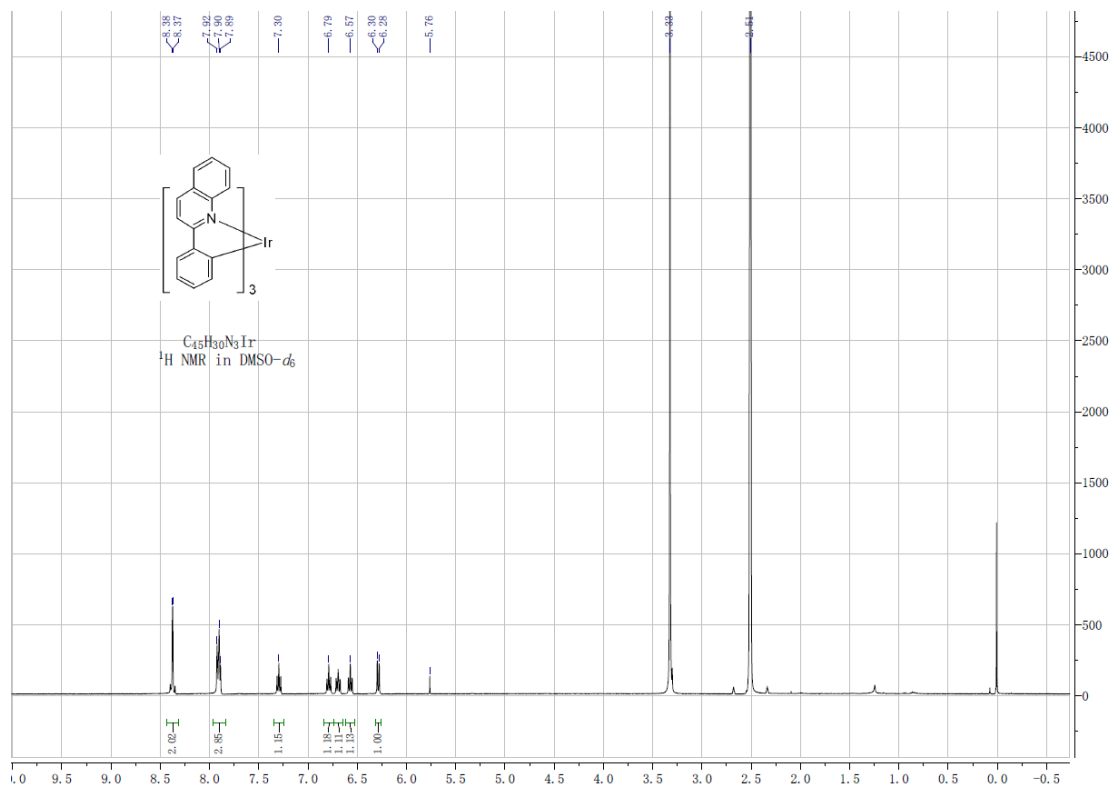

Figure S4.  $^1H$  NMR spectrum of complex 4 in  $DMSO-d_6$ .

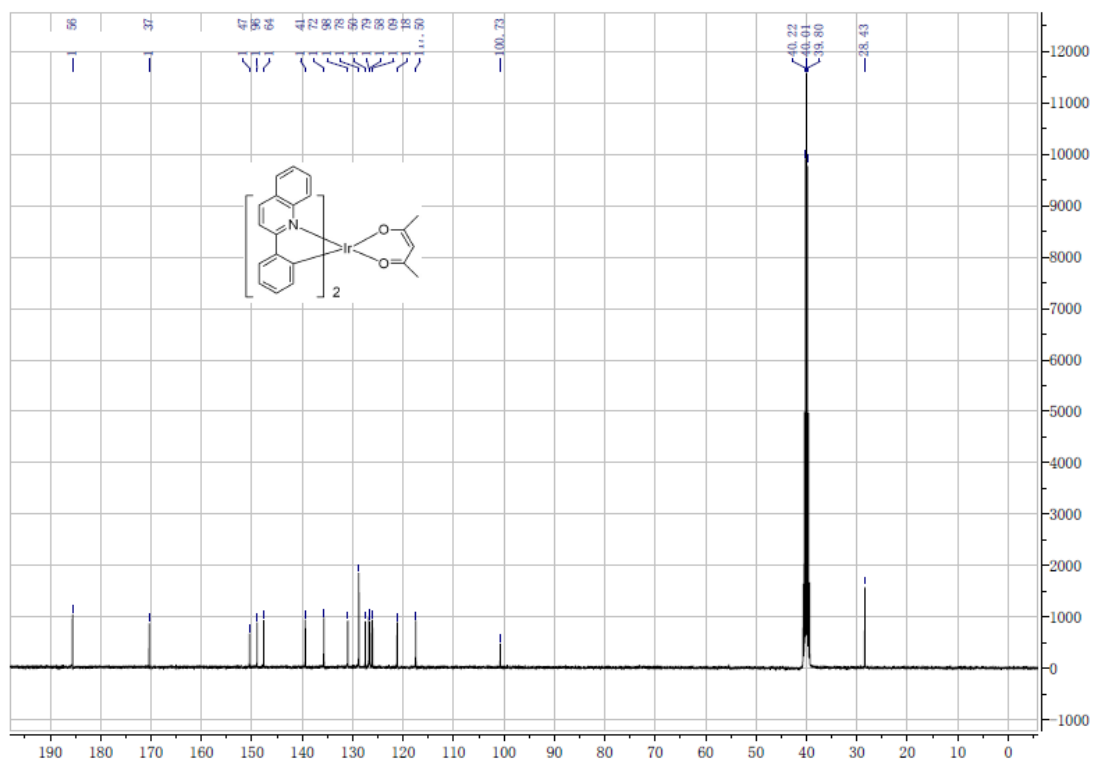

Figure S5.  $^{13}\text{C}$  NMR spectrum of complex **1** in  $\text{DMSO-d}_6$ .

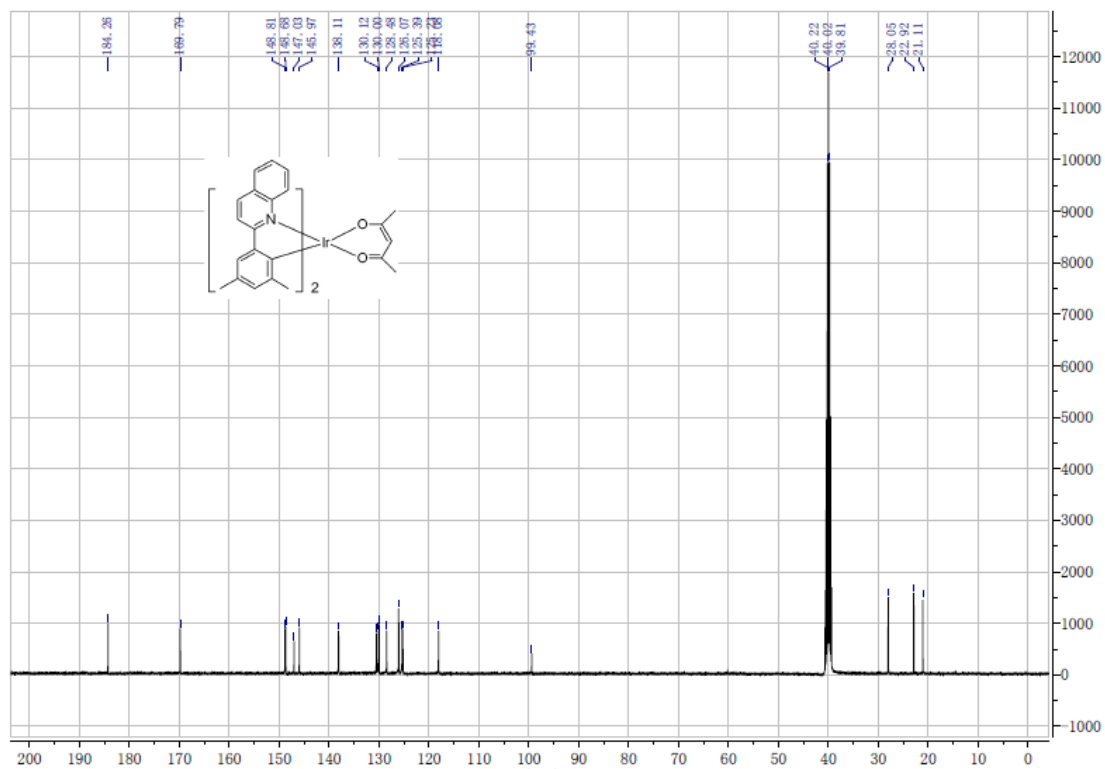

Figure S6.  $^{13}\text{C}$  NMR spectrum of complex **2** in  $\text{DMSO-d}_6$ .

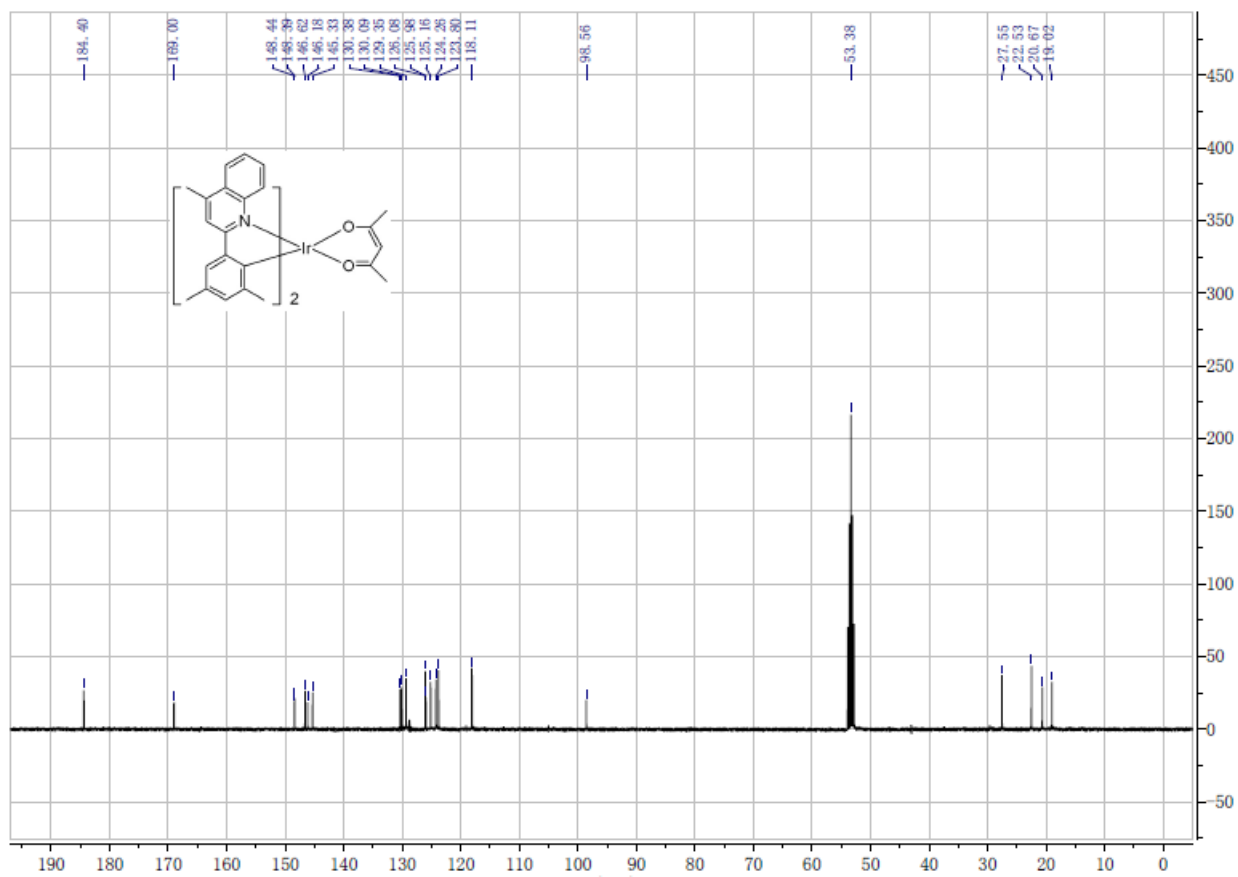

Figure S7.  $^{13}\text{C}$  NMR spectrum of complex 3 in  $\text{CD}_2\text{Cl}_2$ .



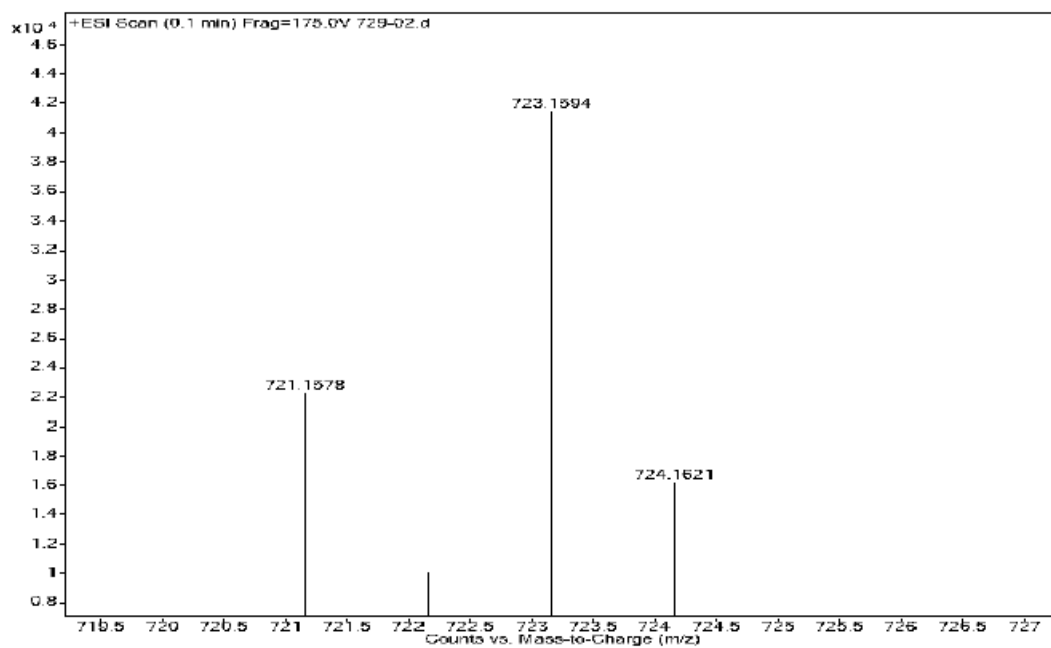

Figure S8. Tof-mass spectrum of complex 1.

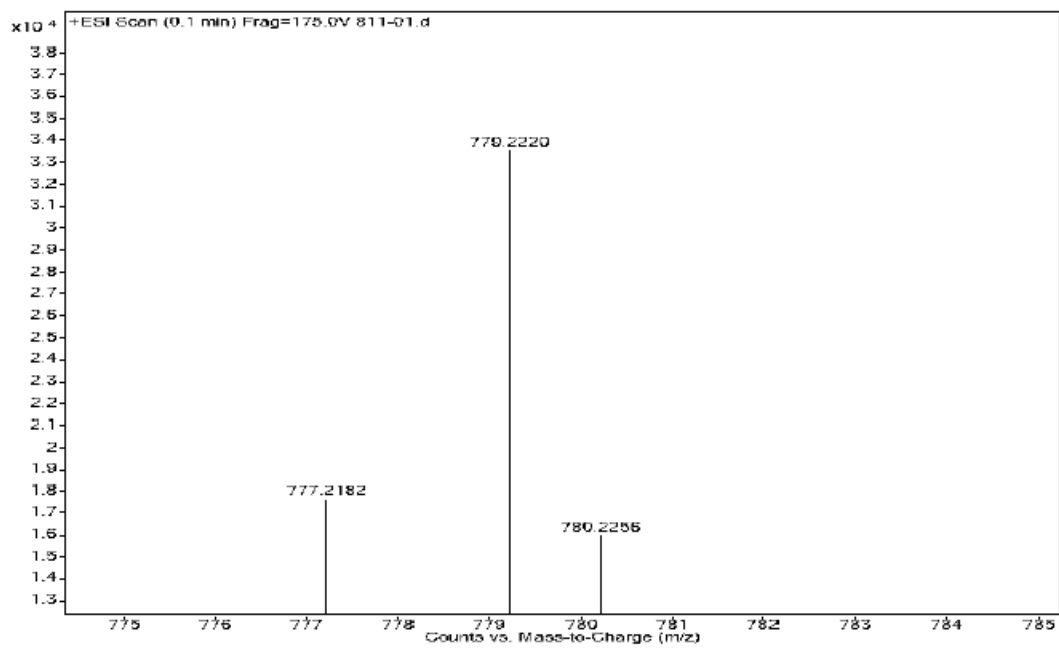

Figure S9. Tof-mass spectrum of complex 2.

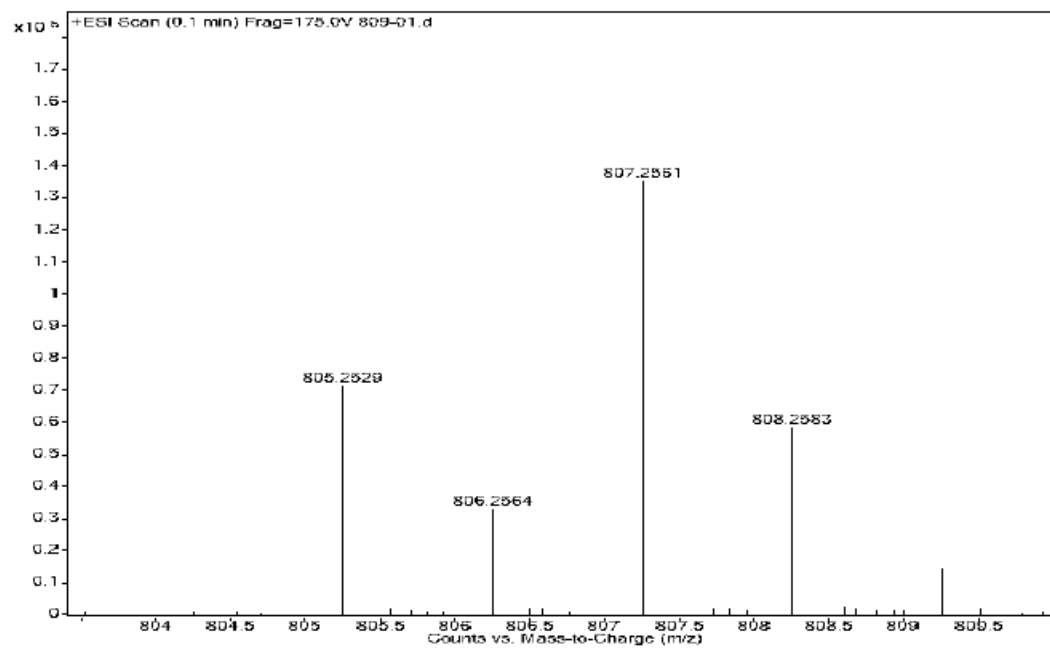

Figure S10. Tof-mass spectrum of complex 3.

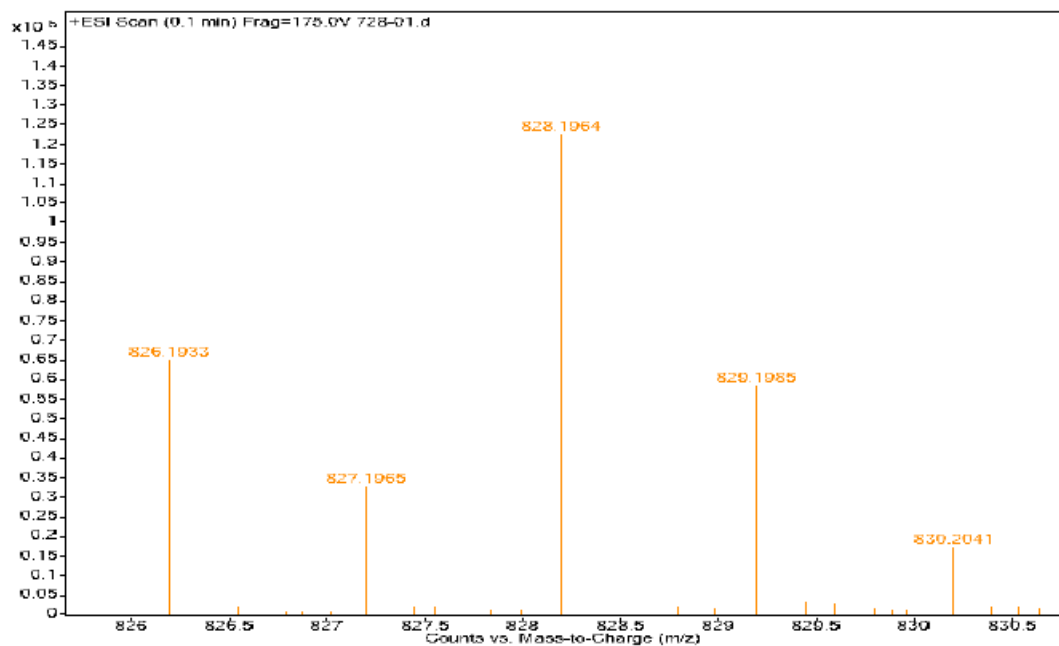

Figure S11. Tof-mass spectrum of complex 4.

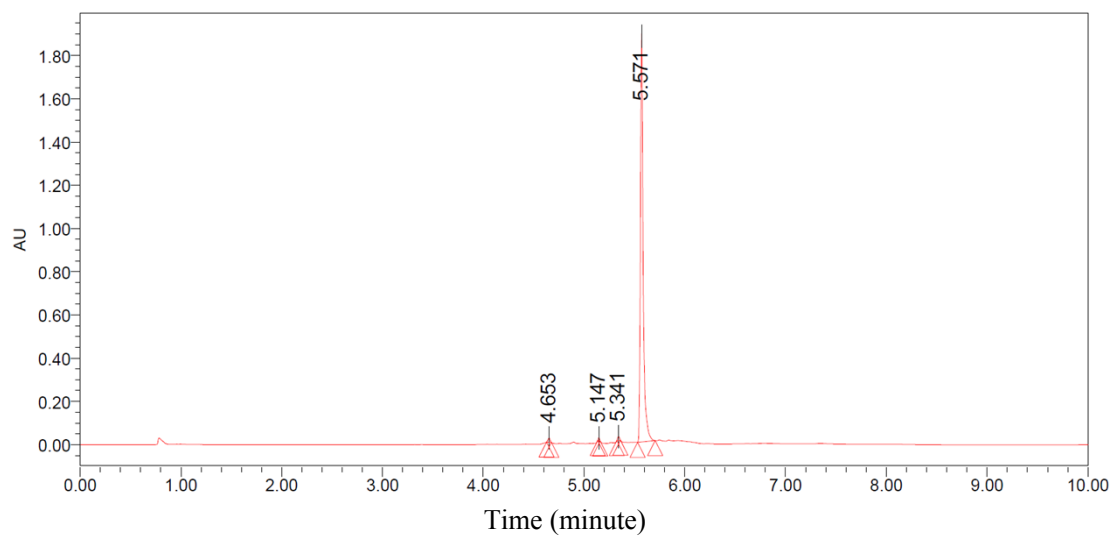

Figure S12. UPLC spectrum of complex 1.

Table S1. The UPLC result of complex 1.

|   | Time (minute) | Area ( $\mu\text{V}\times\text{s}$ ) | Height ( $\mu\text{V}$ ) | % area |
|---|---------------|--------------------------------------|--------------------------|--------|
| 1 | 4.653         | 28101                                | 19692                    | 0.78   |
| 2 | 5.147         | 11867                                | 14255                    | 0.33   |
| 3 | 5.341         | 24266                                | 17481                    | 0.67   |
| 4 | 5.571         | 3559368                              | 1890618                  | 98.23  |

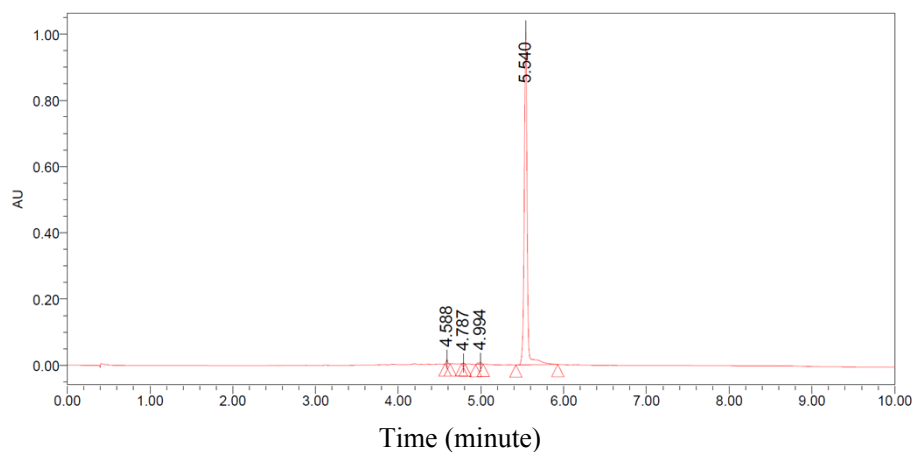

Figure S13. UPLC spectrum of complex **2**.

Table S2. The UPLC result of complex **2**.

|   | Time (minute) | Area ( $\mu\text{V}\times\text{s}$ ) | Height ( $\mu\text{V}$ ) | % area |
|---|---------------|--------------------------------------|--------------------------|--------|
| 1 | 4.588         | 17692                                | 13426                    | 0.70   |
| 2 | 4.787         | 3570                                 | 2738                     | 0.14   |
| 3 | 4.994         | 16333                                | 6311                     | 0.65   |
| 4 | 5.540         | 2481385                              | 1011216                  | 98.51  |

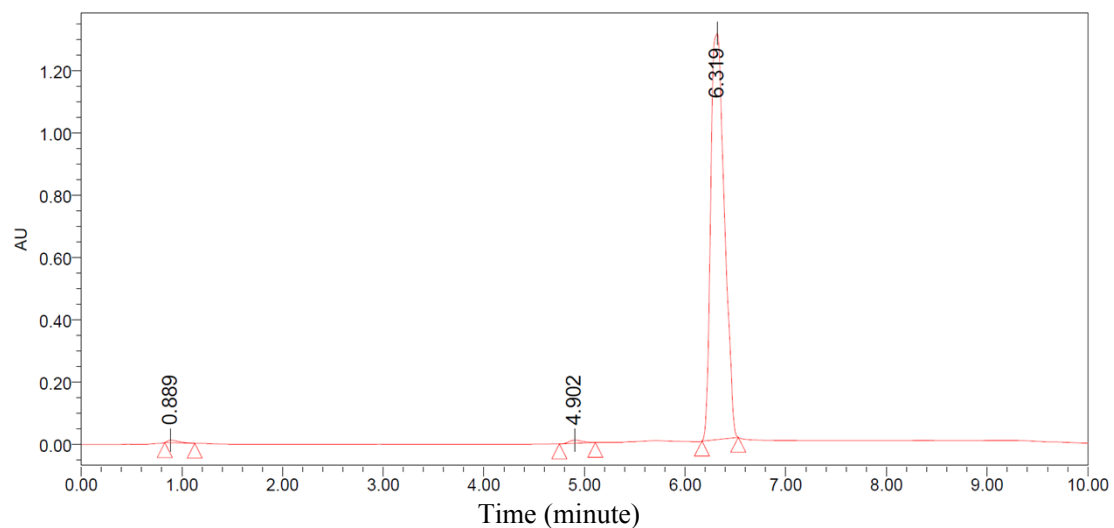

Figure S14. UPLC spectrum of complex 3.

Table S3. The UPLC result of complex 3.

|   | Time (minute) | Area ( $\mu\text{V}\times\text{s}$ ) | Height ( $\mu\text{V}$ ) | % area |
|---|---------------|--------------------------------------|--------------------------|--------|
| 1 | 0.889         | 62776                                | 8409                     | 0.50   |
| 2 | 4.902         | 92601                                | 9969                     | 0.74   |
| 3 | 6.319         | 12298873                             | 1304041                  | 98.75  |

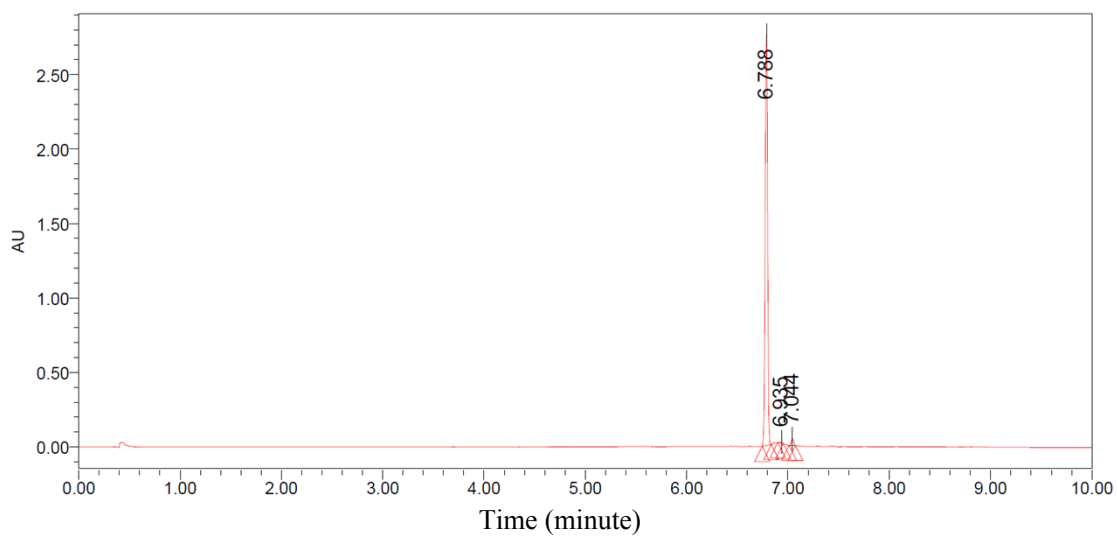

Figure S15. UPLC spectrum of complex 4.

Table S4. The UPLC result of complex 4.

|   | Time (minute) | Area ( $\mu\text{V}\times\text{s}$ ) | Height ( $\mu\text{V}$ ) | % area |
|---|---------------|--------------------------------------|--------------------------|--------|
| 1 | 6.788         | 4658738                              | 2761596                  | 98.13  |
| 2 | 6.935         | 12346                                | 8471                     | 0.26   |
| 3 | 7.044         | 76537                                | 46796                    | 1.61   |



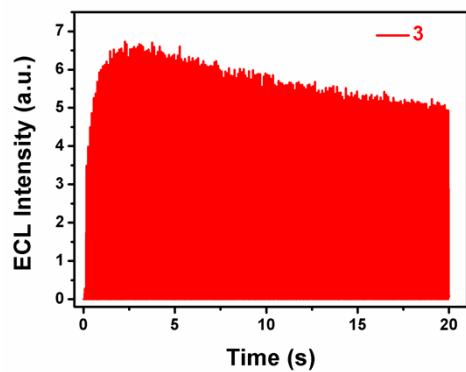

Figure S16. ECL intensity vs time plot of 0.1 mM complex **3** in acetonitrile solution through annihilation process. (oxidative potential= ( $E_a^{\text{ox}}+0.2$ ) V, reductive potential= ( $E_c^{\text{re}}-0.2$ ) V, 10 Hz, 20 s acquisition ).
